# Supplementary material for: What is the Economic Cost of Providing an All Wales Postpartum Haemorrhage Quality Improvement Initiative (OBS Cymru)? A Cost-Consequences Comparison with Standard Care
Source: Springer Nature journal article supplement (doi:10.1007/s41669-022-00362-2), 2022-09-06
Supplement: MOESM2 [file 41669_2022_362_MOESM2_ESM.pdf]

## **What is the economic cost of providing an all Wales postpartum haemorrhage quality improvement initiative (OBS Cymru)? A cost-consequences comparison with standard care**

Megan Dale, Sarah Bell, Susan O'Connell, Cerys Scarr, Kathryn James, Miriam John, Rachel Collis, Peter Collins, Grace Carolan-Rees

[Megan.dale@wales.nhs.uk](mailto:Megan.dale@wales.nhs.uk)

Cedar, Cardiff and Vale University Health Board

Pharmacoeconomics Open

### **Supplementary materials 1: Additional tables**

#### **Funding**

OBS Cymru was funded by an Efficiency Through Technology grant from the Welsh Government. It was supported by Improvement Cymru (the national improvement body for NHS Wales) and the Wales Deanery through Clinical Leadership Fellows.

Werfen loaned 10 Rotem Sigma devices to sites in Wales for the duration of the project and subsidised reagents required to perform assays. Werfen provided technical support, maintenance and annual service of all 12 Welsh devices, funded through the Welsh Government grant.

The funders had no role in study design; collection, analysis, and interpretation of data; writing of the report; and the decision to submit the paper for publication.

#### **Declaration of interest**

RE Collis has received research support from CSL Behring, Werfen and Haemonetics.

PW Collins has received honoraria from CSL Behring and Werfen and research support from CSL Behring, Werfen and Haemonetics. He has received support to attend a conference from CSL Behring.

All other authors have no conflicts of interest to declare

## Supplementary tables

Supplementary table 1: Scenario 2: Resource use, percentage of women in database receiving each intervention.

|                                  | Standard care |                      | OBS Cymru    |                      |
|----------------------------------|---------------|----------------------|--------------|----------------------|
|                                  | n             | Per 1000 maternities | n            | Per 1000 maternities |
| Total maternities                | <b>19623</b>  |                      | <b>19145</b> |                      |
| PPH >1000 mL or clinical concern | 2009          | (102.4/1000)         | 2074         | (108.3/1000)         |
| Blood loss ≥2,500ml              | 135           | (6.9/1000)           | 99           | (5.2/1000)           |

| Resource                                              | Percentage of women in OBS Cymru database receiving intervention |                    | Mean resource use per woman receiving resource |                   |
|-------------------------------------------------------|------------------------------------------------------------------|--------------------|------------------------------------------------|-------------------|
|                                                       | Standard care, n (%)                                             | OBS Cymru n (%)    | Standard care                                  | OBS Cymru         |
| Total number of women recorded in OBS Cymru data base | 2009                                                             | 2074               |                                                |                   |
| Total number of records for analysis                  | 1876                                                             | 1903               |                                                |                   |
| Receiving VHA test                                    | 547 (29.16%)*                                                    | 1007 (52.92%)      |                                                |                   |
| Number of tests per women tested                      |                                                                  |                    | 1.28 tests*±0.75                               | 1.20 tests± 0.65  |
| Blood product use                                     |                                                                  |                    |                                                |                   |
| Red blood cells                                       | 468/1876 (24.95%)                                                | 378 /1903 (19.86%) | 2.39 units ±1.19                               | 2.31 units ± 1.17 |
| Fresh Frozen Plasma                                   | 33 /1876 (1.76%)                                                 | 26 / 1902 (1.375%) | 3.58 units ± 1.87                              | 3.35 units±1.26   |
| Platelet                                              | 17 /1875 (0.91%)                                                 | 8/ 1902(0.42%)     | 1.65 pool± 0.86                                | 1.50 pool± 0.53   |
| Cryoprecipitate                                       | 7 /1875 (0.37%)                                                  | 4 / 1902 (0.21%)   | 2.57 pool± 1.40                                | 2 pool± 0         |
| Fibrinogen                                            | 31 /1876 (1.65%)                                                 | 30/1901 (1.58%)    | 4.35g ± 2.12                                   | 5.13g± 2.16       |
| Other additional care                                 |                                                                  |                    |                                                |                   |
| Hysterectomy                                          | 6 /1876 (0.32%)                                                  | 9 /1903 (0.47%)    | na                                             | na                |
|                                                       |                                                                  |                    |                                                | 15.33 hours±      |
| Critical care Level 3                                 | 16/1876 (0.85%)                                                  | 11/1903 (0.58%)    | 27.14 hours ± 39.01                            | 19.82 hours± 6.24 |
| Length of stay (delivery to discharge)                | na                                                               | na                 | 2.68 days±1.95                                 | 2.68 days±1.89    |

\* Costs for ROTEM were not included in standard care arm.

Supplementary table 2: Scenario 3: Resource use, percentage of women in database receiving each intervention.

|                                  | Standard care |                      | OBS Cymru   |                      |
|----------------------------------|---------------|----------------------|-------------|----------------------|
|                                  | n             | Per 1000 maternities | n           | Per 1000 maternities |
| Total maternities                | <b>4369</b>   |                      | <b>4226</b> |                      |
| PPH >1000 mL or clinical concern | 409           | (93.6/1000)          | 428         | (101.3/1000)         |
| Blood loss ≥2,500ml              | 36            | (8.2/1000)           | 22          | (5.2/1000)           |

| Resource                                              | Percentage of women in OBS Cymru database receiving intervention |                   | Mean resource use per woman receiving resource |                 |
|-------------------------------------------------------|------------------------------------------------------------------|-------------------|------------------------------------------------|-----------------|
|                                                       | Standard care, n (%)                                             | OBS Cymru n (%)   | Standard care                                  | OBS Cymru       |
| Total number of women recorded in OBS Cymru data base | 409                                                              | 428               |                                                |                 |
| Total number of records for analysis                  | 408                                                              | 419               |                                                |                 |
| Receiving VHA test                                    | 5/408 (1.23%)*                                                   | 257 /419 (61.34)% |                                                |                 |
| Number of tests per women tested                      |                                                                  |                   | 1.00 tests*±0                                  | 1.11tests±0.46  |
| Blood product use                                     |                                                                  |                   |                                                |                 |
| Red blood cells                                       | 101 / 408 (24.75%)                                               | 73 /419 (17.42%)  | 2.52 units±1.50                                | 2.33 units±0.94 |
| Fresh Frozen Plasma                                   | 11 / 408 (2.70%)                                                 | 2 /419 (0.48%)    | 3.64 units±1.74                                | 1.5 units±0.71  |
| Platelet                                              | 2 / 407 (0.49%)                                                  | 3 / 419 (0.72%)   | 1 pool±0                                       | 1.33 pool±0.58  |
| Cryoprecipitate                                       | 3 / 407 (0.74%)                                                  | 2 / 419 (0.48%)   | 2.0 pool±0                                     | 1.5 pool±0.71   |
| Fibrinogen                                            | 4 / 408 (0.98%)                                                  | 5 / 419 (1.19%)   | 3.75g±2.06                                     | 4.40g±4.39      |
| Other additional care                                 |                                                                  |                   |                                                |                 |
| Hysterectomy                                          | 2 / 408(0.49%)                                                   | 0 / 419 (0.00%)   | na                                             | na              |
| Critical care Level 3                                 | 5 / 408(1.23%)                                                   | 0 / 419(0.00%)    | 17.86 hours ± 15.27                            | 0 hours         |
| Length of stay (delivery to discharge)                | na                                                               | na                | 2.66 days±1.95                                 | 2.53 days±1.65  |

\* Costs for ROTEM were not included in standard care arm.

Supplementary table 3: Result breakdown for all scenarios

|                     | Scenario 1 |           |        | Scenario 2 |           |        | Scenario 3 |           |        |
|---------------------|------------|-----------|--------|------------|-----------|--------|------------|-----------|--------|
|                     | Std care   | OBS Cymru | Change | Std care   | OBS Cymru | Change | Std care   | OBS Cymru | Change |
| OBS Cymru programme | £0         | £1        | £1     | £0         | £1        | £1     | £0         | £1        | £1     |
| ROTEM costs         | £0         | £26       | £26    | £0         | £27       | £27    | £0         | £30       | £30    |
| Blood product costs | £150       | £114      | £36    | £144       | £119      | -£25   | £136       | £97       | -£39   |
| Hysterectomy costs  | £13        | £18       | £5     | £13        | £19       | £6     | £19        | £19       | -£19   |
| ICU costs           | £26        | £13       | £13    | £21        | £11       | -£11   | £20        | £20       | -£20   |
| Included staff      | £5         | £3        | £2     | £5         | £3        | -£2    | £5         | £3        | -£2    |
| Length of stay      | £891       | £920      | £29    | £923       | £923      | £0     | £919       | £874      | -£45   |
| Total               | £1,0853    | £1,095    | £10    | £1,106     | £1,103    | -£3    | £1,099     | £1,005    | -£194  |

Supplementary table 4: Deterministic sensitivity analysis parameters, Scenario 1

| Selected ROTEM costs                   | Cost per unit | Low       |         | High      |        | Total range<br>£ |
|----------------------------------------|---------------|-----------|---------|-----------|--------|------------------|
|                                        |               | Variable  | Result  | Variable  | Result |                  |
| Stay, post delivery                    | 4049.229      | 3,887.26  | -£27.28 | £4,211.20 | £46.34 | £73.62           |
| Fibrinogen (g)                         | 100           | 53.58     | -£2.71  | 146.72    | £21.85 | £24.56           |
| RBC units                              | 701           | 619.55    | £0.53   | 782.45    | £18.54 | £18.01           |
| Total hours spent in ICU               | 218.053       | 83.79     | £1.34   | £352.21   | £17.72 | £16.38           |
| Hospital day £                         | £344.78       | £275.83   | £3.72   | 413.00    | £15.28 | £11.57           |
| hysterectomy                           | 7             | 5.00      | £4.37   | £9.00     | £14.70 | £10.33           |
| Red Blood cells,<br>subsequent units £ | £167.68       | £134.14   | £13.39  | £201.22   | £5.67  | £7.72            |
| Cartridge cost £                       | 30            | 24        | £6.02   | 36.00     | £13.05 | £7.03            |
| hour in ICU £                          | £92.57        | £74.06    | £12.17  | £111.09   | £6.90  | £5.27            |
| Red Blood cells, first unit<br>£       | £190.23       | £152.19   | £12.01  | £228.28   | £7.06  | £4.95            |
| Fresh Frozen Plasma (FFP)              | 78.04         | 44.40     | £8.11   | 111.69    | £10.95 | £2.84            |
| hysterectomy £                         | £3,916.61     | £3,133.29 | £8.50   | £4,699.93 | £10.57 | £2.07            |
| Platelets                              | 7.0094        | 0.51      | £8.55   | 13.51     | £10.51 | £1.96            |
| Consultant Haematologist               | £0.01         | 0.00      | £8.75   | £0.01     | £10.32 | £1.57            |
| ROTEM annual fee £                     | 1950          | 1560      | £8.81   | 2,340.00  | £10.26 | £1.45            |
| Consultant £ hourly                    | £109          | £87       | £10.04  | £130.80   | £9.03  | £1.01            |
| Women receiving RBC                    | 302           | 271.48    | £9.08   | 332.52    | £9.99  | £0.91            |
| Number of ROTEM tests                  | 889           | 906.39    | £9.91   | 941.36    | £10.68 | £0.77            |
| ODP time to deliver (min)              | 5             | 4         | £9.16   | 6.00      | £9.90  | £0.74            |
| Band 5 £ hourly                        | £38           | £30       | £9.16   | £45.60    | £9.90  | £0.74            |
| Cryoprecipitate                        | 8.00632       | 6.00      | £9.24   | 10.00     | £9.82  | £0.58            |
| Platelets, first unit £                | £229.03       | £183.22   | £9.77   | £274.83   | £9.29  | £0.48            |
| QA tests per year                      | 12            | 9.6       | £9.29   | 14.40     | £9.77  | £0.48            |
| Rotem QC cartridge £                   | 54            | 43.2      | £9.29   | 64.80     | £9.77  | £0.48            |
| FFP, subsequent £                      | £64.01        | £51.21    | £9.75   | £76.82    | £9.31  | £0.44            |
| cryoprecipitate,<br>subsequent £       | £219.01       | £175.21   | £9.73   | £262.82   | £9.33  | £0.40            |
| Platelets, subsequent £                | £229.03       | £183.22   | £9.68   | £274.83   | £9.38  | £0.30            |
| Cryoprecipitate, first unit<br>£       | £219.01       | £175.21   | £9.62   | £262.82   | £9.45  | £0.17            |
| FFP, first unit £                      | £64.01        | £51.21    | £9.60   | £76.82    | £9.46  | £0.13            |
| Fibrinogen, (Fb) £                     | £400.00       | £320.00   | £9.58   | £480.00   | £9.48  | £0.10            |
